# Supplementary material for: Mitoquinone shifts energy metabolism to reduce ROS-induced oxeiptosis in female granulosa cells and mouse oocytes
Source: PubMed Central journal article supplement (PMC9876626; doi:10.18632/aging.204475), 2023-01-09
Supplement: aging-15-204475-s003.pdf [file aging-15-204475-s003.pdf]

## SUPPLEMENTARY TABLE

Supplementary Table 1. Primer sequences designed for RT-PCR.

| Primers | Forward                         | Reverse                       |
|---------|---------------------------------|-------------------------------|
| AIFM1   | F-CGTAAAGCCGTAAAGGCATCG         | R-AGAAGACGTAATCCCGCTGTT       |
| PGAM5   | F-CAA ACC CAG AAT TGT TCT CCT T | R-ATG TGG TCT TCC TGA ATC CCT |
| HK2     | F-TCCGTAACATTCTCATCGATTTCA      | R-TGTCTTGAGCCGCTCTGAGAT       |
| GPI     | F-GACCCAGCACCCCATACG            | R-CAAGAAGTTGGCCAGGAGGAT       |
| ENO1    | F-TGGGAAAGCTGGCTACACTGA         | R-CTCGGAGGCCGCTACGT           |
| PKM1    | F-TCTGAGCGGTCTTTGCTAGTGA        | R-TGACATAATGCTCCCCTTTTGG      |
| LDHA    | F-GAAGCGGTTGCAATCTGGAT          | R-GGTGAACTCCCAGCCTTTCC        |
| PDHA1   | F-ACCCACAGACCATCTCATCA          | R-CCCCGGGTGAAAGTAAAGC         |
| PDHB    | F-AACTGTGGTTTCCCATTCAAGAC       | R-TTAGATAGCACTGCTGCAGCTTCT    |
| CS-F    | F-TCTGGAGCCGAGCCTTAGG           | R-GACCCTCTGTGCTCATGGACTT      |
| MDH1    | F-GCTGTCATCAAGGCTCGAAAAC        | R-GGTCACAGATGGCTTTTGCA        |
| KGDH    | F-TGC TCG GCA ATT CAG TCA TC    | R-GCC AGT GTG CCA TCG CTT A   |
| IDH1    | F-CGG AAC CCA AAA GGT GAC AT    | R-TGG CAA CAC CAC CAC CTT CT  |
| AMH     | F-CGC TGC TTC ACA CGG ATG ACC   | R-GGT GGC GAC TCC TCG AGT TCC |
| RNU6-1  | F-CTCGCTTCGGCAGCACATATACT       | R-ACGCTTCACGAATTTGCGTGT C     |
